# Supplementary material for: Highly stable lanthanide-doped CsPbI3 perovskite nanocrystals with near-unity quantum yield for efficient red light-emitting diodes
Source: Royal Society of Chemistry journal article supplement (doi:10.1039/d2nr06317d), 2022-12-13
Supplement: d2nr06317d1.pdf [file d2nr06317d1.pdf]

Electronic supplementary information (ESI)

**Highly stable lanthanide-doped CsPbI<sub>3</sub> perovskite nanocrystals with near-unity quantum yield for efficient red light-emitting diodes**

Wenlin Xia<sup>a</sup>, Zhenwei Ren<sup>a,\*</sup>, Zhishuai Zheng<sup>a</sup>, Chengzhao Luo<sup>a</sup>, Jie Li<sup>a</sup>, Wenchen Ma<sup>a</sup>, Xin Zhou<sup>a</sup>, and Yu Chen<sup>a,b,\*</sup>

<sup>a</sup>*School of Optoelectronic Science and Engineering & Collaborative Innovation Center of Suzhou Nano Science and Technology, Soochow University, Suzhou 215006, China  
Email: zhwren@suda.edu.cn; chen\_yu@suda.edu.cn*

<sup>b</sup>*National University of Singapore Suzhou Research Institute, Dushu Lake Science and Education Innovation District, Suzhou 215123, China*

**Table S1.** The mole ratio of La/Pb in La-doped CsPbI<sub>3</sub> NCs measured by inductively

| La/Pb in the reaction system | 5%    | 10%   | 15%   | 20%   |
|------------------------------|-------|-------|-------|-------|
| Measured by ICP-OES          | 0.18% | 0.51% | 0.67% | 0.96% |

coupled plasma optical emission spectrometry (ICP-OES).

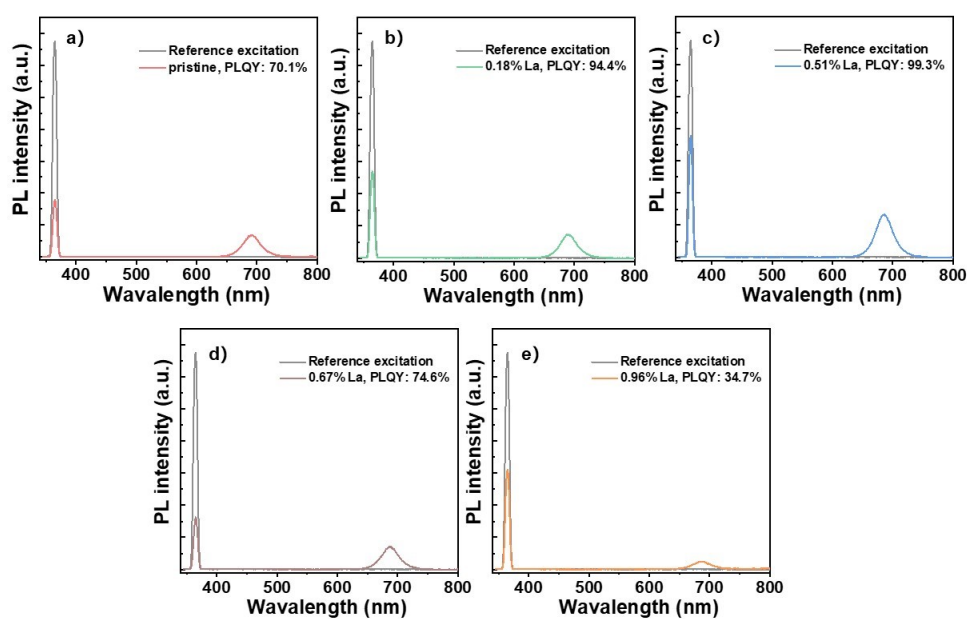

**Fig. S1.** Photoluminescence quantum yield (PLQY) measurements of a) pristine and La-doped CsPbI<sub>3</sub> NCs with different La ratios: b) 0.18%, c) 0.51%, d) 0.67%, and e) 0.96%.

**Table S2.** The fitted parameters of TRPL decay curves from the bi-exponential function for pristine and La-doped CsPbI<sub>3</sub> NCs with different doping ratios.

| QDs      | A <sub>1</sub> | $\tau_1$ (ns)  | A <sub>2</sub> | $\tau_2$ (ns)   | $\tau_{\text{average}}$ (ns) | $\chi^2$ |
|----------|----------------|----------------|----------------|-----------------|------------------------------|----------|
| pristine | 1369.97        | 40.36 (61.58%) | 259.75         | 132.68 (38.42%) | 75.82                        | 1.014    |
| 0.18%    | 1011.82        | 43.89 (56.60%) | 173.92         | 195.70 (43.40%) | 109.76                       | 1.003    |
| 0.51%    | 1301.53        | 82.33 (37.78%) | 543.23         | 324.90 (62.22%) | 233.26                       | 1.034    |
| 0.67%    | 995.85         | 55.82 (59.31%) | 139.50         | 273.32 (40.69%) | 144.31                       | 1.088    |
| 0.96%    | 1532.29        | 31.52 (63.63%) | 347.55         | 79.43 (36.37%)  | 48.94                        | 0.989    |

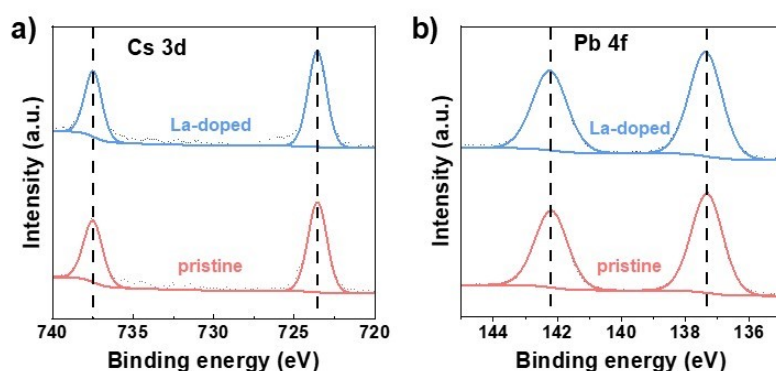

**Fig. S2.** X-ray photoelectron spectroscopy (XPS) measurements of a) Cs 3d and b) Pb 4f signals for pristine and 0.51% La-doped NCs.



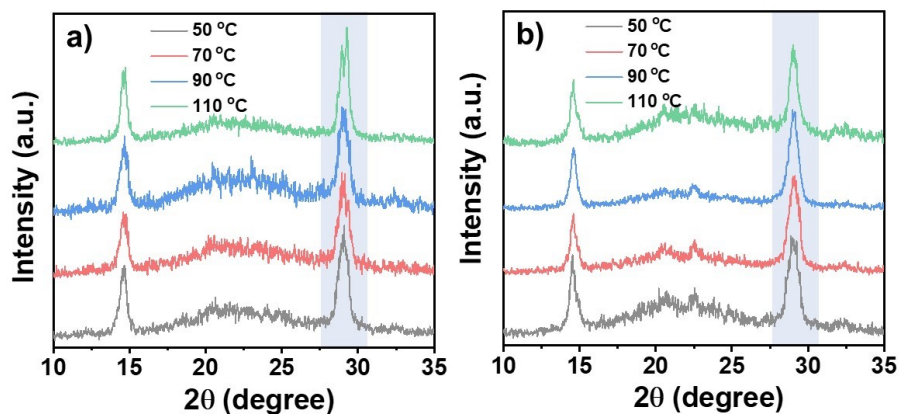

**Fig. S3.** XRD patterns of a) pristine and b) La-doped CsPbI<sub>3</sub> NCs treated under different temperatures.

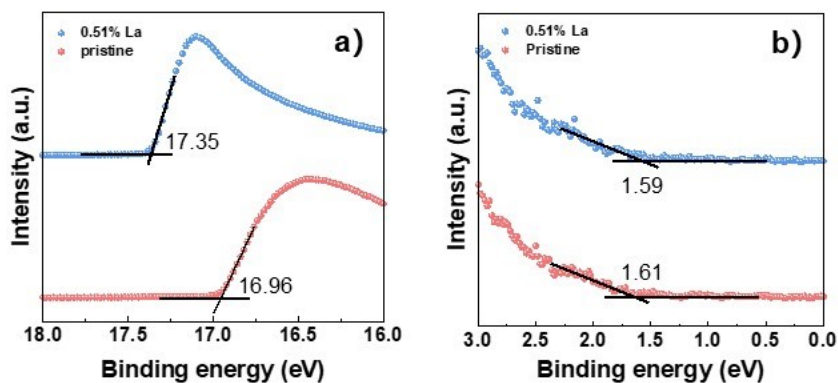

**Fig. S4.** Ultraviolet photoelectron spectroscopy (UPS) measurements for pristine and La-doped NCs at a) high and b) low binding energy regions.

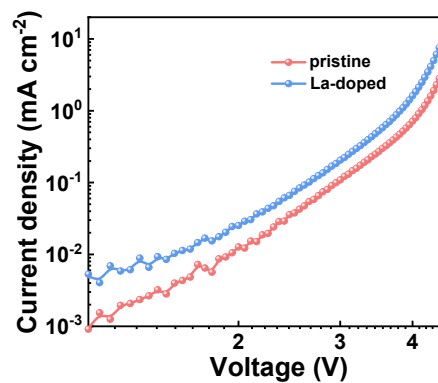

**Fig. S5.** The space charge-limited current (SCLC) measurements for pristine and La-doped hole-only device with the structure of ITO/PEDOT: PSS/Poly-TPD/NCs/CBP/MoO<sub>3</sub>/Al.

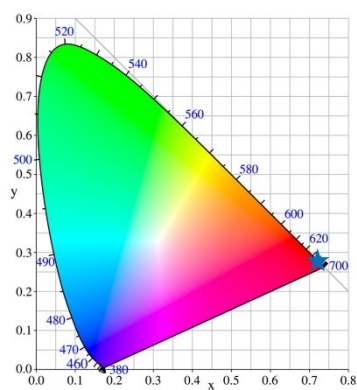

**Fig. S6.** The CIE chromaticity coordinate at (0.72, 0.28) for the La-doped PeLEDs.

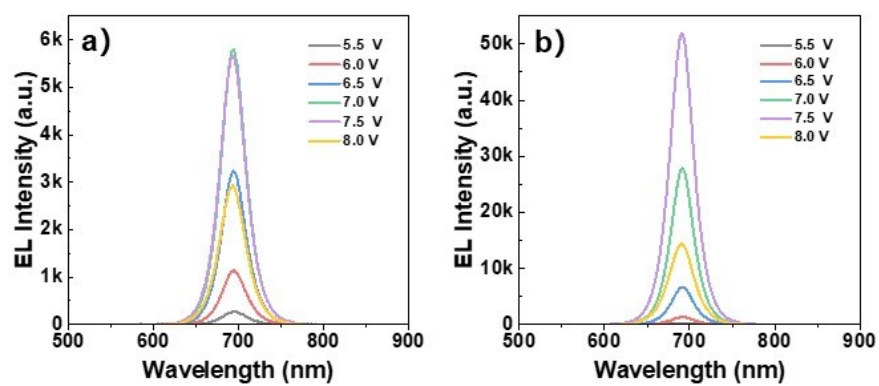

**Fig. S7.** The EL spectra for a) pristine and b) La-doped PeLEDs at different voltages.
